# Supplementary material for: Interplay between oxidative potential and health risk of PM 2.5 -bound metals at a site of the Indo-Gangetic Plain—exploring the influence of biomass burning
Source: Royal Society of Chemistry journal article supplement (doi:10.1039/d5em00340g), 2025-01-01
Supplement: d5em00340g1.pdf [file d5em00340g1.pdf]

**Interplay between Oxidative Potential and Health Risk of PM<sub>2.5</sub>-Bound Metals at a Site of Indo-Gangetic Plain—Exploring the Influence of Biomass Burning**

Muskan Agarwal, Isha Goyal and Anita Lakhani\*

*Department of Chemistry, Faculty of Science, Dayalbagh Educational Institute, Dayalbagh, Agra-282005*

Corresponding Author's e-mail: [anita.lakhani01@gmail.com](mailto:anita.lakhani01@gmail.com)

## Health Risk Assessment (HRA)

The daily intake of the chemical through oral ingestion ( $CDI_{ij}^{ing}$ ,  $\text{mg kg}^{-1} \text{ day}^{-1}$ ), exposure concentration through inhalation ( $EC_{ij}^{inh}$ ,  $\mu\text{g m}^{-3}$ ), and skin absorption dose through dermal contact ( $DAD_{ij}^{der}$ ,  $\text{mg kg}^{-1} \text{ day}^{-1}$ ) (Zhang et al., 2021 and USEPA, 2014) were calculated using the Eqs. (S1)–(S3) below:

$$CDI_{ij}^{ing} = \frac{C_{ij} \times IR_{ing} \times EF \times ED \times CF}{(BW \times AT)} \quad (S1)$$

$$EC_{ij}^{inh} = \frac{C_{ij} \times IR_{inh} \times ET \times EF \times ED}{(BW \times AT_n)} \quad (S2)$$

$$DAD_{ij}^{der} = \frac{C_{ij} \times SA \times AF \times ABS \times EF \times ED \times CF}{(BW \times AT)} \quad (S3)$$

The corresponding hazard quotient (HQ) was calculated as shown in Eqs. (S4)–(S7) and the carcinogenic risk (CR) of toxic metals through the three pathways were further evaluated based on Eqs. (S8)–(S11).

$$HQ_{ing} = \frac{CDI_{ij}^{ing}}{RfD_j^{ing}} \quad (S4)$$

$$HQ_{inh} = \frac{EC_{ij}^{inh}}{RfC_j^{inh} \times 1000} \quad (S5)$$

$$HQ_{der} = \frac{DAD_{ij}^{der}}{RfD_j^{der} \times ABS} \quad (S6)$$

$$\text{Hazard index } (HI_i) = \sum(HQ_{ij}) \quad (S7)$$

$$CR_{ing} = LCDI_{ij}^{ing} \times SF \quad (S8)$$

$$CR_{inh} = LEC_{ij}^{inh} \times IUR \quad (S9)$$

$$CR_{der} = LDAD_{ij}^{der} \times RfD_j^{der} \times ABS \quad (S10)$$

$$\text{Carcinogenic risk } (CR_i) = \sum(CR_{ij}) \quad (S11)$$

RfD<sub>o</sub> (the oral reference doses (mg kg<sup>-1</sup> day<sup>-1</sup>)), RfC<sub>i</sub> (inhalation reference concentration (mg m<sup>-3</sup>)), ABSG<sub>i</sub> (gastrointestinal absorption factor), SF<sub>o</sub> (oral slope factor (mg kg<sup>-1</sup> day<sup>-1</sup>)) and IUR (inhalation unit risk (µg m<sup>-3</sup>)). A hazard index (HI), i.e., HQ all added up, is used for assessing the chronic effects of non-carcinogenic risks. When both HQs ≤ 1 and HI ≤ 1, there is no significant risk of chronic effects. By contrast, HQs > 1 or HI > 1 indicate a possibility of the occurrence of chronic effects (Murari et al., 2020). The carcinogen risk (CR) value shows the chance of developing any type of cancer by an individual due to a lifetime exposure to carcinogenic metals, divided into five categories: as very low (CR ≤ 10<sup>-6</sup>), low (10<sup>-6</sup> ≤ CR < 10<sup>-4</sup>), moderate (10<sup>-4</sup> ≤ CR < 10<sup>-3</sup>), high (10<sup>-3</sup> ≤ CR < 10<sup>-1</sup>), and very high (CR ≥ 10<sup>-1</sup>) (Roy et al., 2019; Zhang et al., 2021a).

It is imperative to emphasize that the toxicity of Cr is predominantly linked to its hexavalent Cr(VI) form and thus health risk was estimated this form of Cr, which is capable of absorption through the respiratory and gastrointestinal tracts, and, to some extent, through dermal contact. In contrast, the trivalent Cr(III) is characterized by minimal absorption across all pathways. Thus, the concentration of Cr(VI) was estimated by taking the one-sixth part of total concentration of Cr as the ratio of Cr(VI) to Cr(III) in the air is about 1 : 6.

### Positive Matrix Factorization (PMF)

The PMF v5.0 model requires two input files: one of the measured concentrations of the species and another for the estimated uncertainty of the concentration (Sharma & Mandal, 2017). A speciated data set can be viewed as a data matrix  $X$  of  $i$  by  $j$  dimensions, in which  $i$  number of samples and  $j$  chemical species are measured. The aim of multivariate receptor modeling, for example, with PMF, is to identify a number of factors  $p$ , the species profile  $f$  of each source, and the amount of mass  $g$  contributed by each factor to each individual sample which is given as:

$$X_{ij} = \sum_{k=1}^p \cdot g_{ik} f_{kj} + e_{ij}$$

where  $e_{ij}$  is the residual for each sample/species.

Results are constrained so that no sample can have a negative source contribution. PMF allows each data point to be individually weighed. This feature allows the analyst to adjust the influence of each data point, depending on the confidence in the measurement. For example, data below detection limit can be retained for use in the model, with the associated uncertainty adjusted so these data points have less influence on the solution than measurements above the detection limit. The PMF solution minimizes the object function  $Q$ , based upon these uncertainties ( $u$ ) as follows:

$$Q = \sum_{i=1}^n \cdot \sum_{j=1}^m \cdot \left[ \frac{X_{ij} - \sum_{k=1}^p \cdot g_{ik} f_{kj}}{u_{ij}} \right]^2$$

where  $X_{ij}$  are the measured concentration (in µg m<sup>-3</sup>),  $u_{ij}$  are the estimated uncertainty (in µg m<sup>-3</sup>),  $n$  is the number of samples,  $m$  is the number of species and  $p$  is the number of sources included

in the analysis. The detail descriptions of EPA PMF v.5.0 are described in its guide and EPA PMF User Guide (2008) (EPA PMF Guide, 2008). In this study, information on chemical properties of PM<sub>2.5</sub> samples has been used as input to the PMF model for the 14 metal species and DTTv studied. Categorization of quality of data was based on the signal to noise ratio (S/N) and the percentage of sample method detection limit (MDL). Those species which have  $S/N \geq 2$  were categorized as strong in data quality. Those with S/N between 0.2 and 2 were categorized as weak in quality. These species are not likely to provide enough variation in concentration and therefore contribute to the noise in the results. Those species with an S/N ratio below 0.2 are classified as bad values and were thus excluded from further analysis. In the present case, signal to noise ratio (S/N) estimated as  $N = 0.6$  and the model performance in a base run showed coefficient of determination ( $R^2$ ) (Table S1) between the modeled and experimental concentration of PM<sub>2.5</sub> and metals along with DTTv for each sample (Figure S1), respectively and most of the other chemical species are also well reconstructed.

The PMF analysis was employed to unravel the contributions of diverse pollution sources to PM<sub>2.5</sub> mass within an area of Agra. The model fit parameter 'Q' was carefully assessed to ensure its placement within the FPEAK range, seeking the optimal factor resolution. Default robust mode was used to minimize the potential influence of extreme values on the solution. A meticulous trial-and-error approach was employed to systematically explore varying source numbers, pinpointing the optimal configuration. Subsequently, PMF was applied to the datasets using the selected factors, with close examination of the resultant Q value alterations. Notably, robust Q values represent those with minimized outlier impact, contrasting with true Q values, which lack outlier control. In this study, the remarkable proximity between robust and true Q values signified a reasonable model fit, even in the presence of outliers. Furthermore, to confirm attainment of a consistent global minimum and ensure equitable outlier fitting across random runs, a sufficiently narrow Q value range was verified. Analysis of the Q values (model fit parameter) variations revealed that a four-factor solution yielded the most robust and interpretable results.

**Table S1. Statistical Parameters observed during PMF Analysis**

|                         |                  |              |           |                      | <b>KS Test</b> | <b>KS Test</b> |
|-------------------------|------------------|--------------|-----------|----------------------|----------------|----------------|
| <b>Species</b>          | <b>Intercept</b> | <b>Slope</b> | <b>SE</b> | <b>r<sup>2</sup></b> | <b>Stat</b>    | <b>P Value</b> |
| <b>PM<sub>2.5</sub></b> | 0.00             | 1.00         | 0.00      | 1.00                 | 0.18           | 0.93           |
| <b>Ca</b>               | 0.14             | 0.94         | 0.32      | 0.93                 | 0.21           | 0.82           |
| <b>Fe</b>               | 0.00             | 1.00         | 0.09      | 1.00                 | 0.20           | 0.87           |
| <b>Na</b>               | 0.04             | 0.95         | 0.22      | 0.90                 | 0.26           | 0.60           |
| <b>Mg</b>               | 0.24             | 0.81         | 0.13      | 0.94                 | 0.24           | 0.68           |
| <b>K</b>                | -0.12            | 1.02         | 0.22      | 0.98                 | 0.23           | 0.71           |
| <b>Al</b>               | 0.62             | 0.27         | 0.35      | 0.21                 | 0.20           | 0.86           |
| <b>Ba</b>               | 0.01             | 0.21         | 0.00      | 0.20                 | 0.18           | 0.93           |
| <b>Cd</b>               | 0.01             | 0.49         | 0.01      | 0.13                 | 0.32           | 0.30           |
| <b>Cr</b>               | 0.04             | 0.19         | 0.01      | 0.02                 | 0.22           | 0.78           |
| <b>Cu</b>               | 0.00             | 1.03         | 0.00      | 0.95                 | 0.13           | 1.00           |
| <b>Mn</b>               | 0.07             | 0.17         | 0.02      | 0.08                 | 0.27           | 0.54           |
| <b>Ni</b>               | 0.03             | 0.04         | 0.01      | 0.00                 | 0.16           | 0.98           |
| <b>Pb</b>               | 0.24             | -0.05        | 0.08      | 0.00                 | 0.17           | 0.97           |
| <b>Se</b>               | 0.10             | 0.24         | 0.05      | 0.53                 | 0.20           | 0.88           |
| <b>Zn</b>               | 0.20             | 0.51         | 0.13      | 0.24                 | 0.18           | 0.94           |
| <b>DTTv</b>             | 0.00             | 1.00         | 0.02      | 1.00                 | 0.20           | 0.88           |

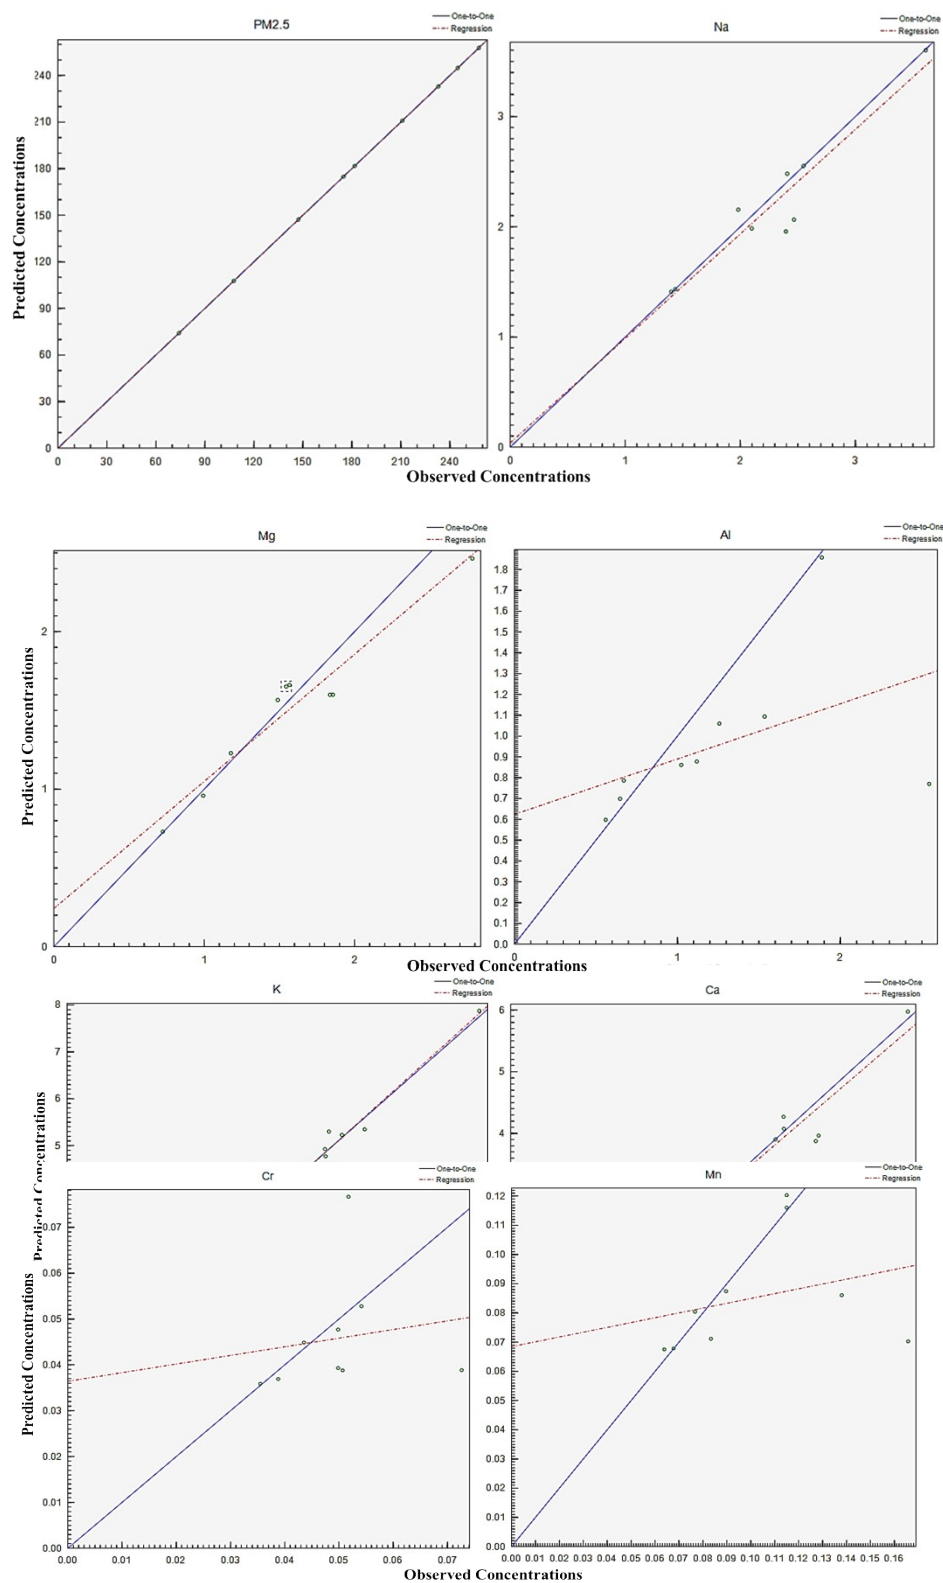

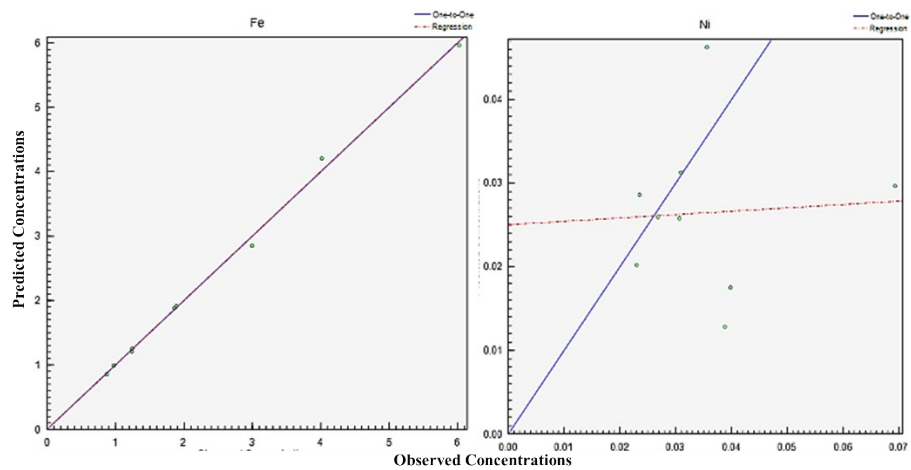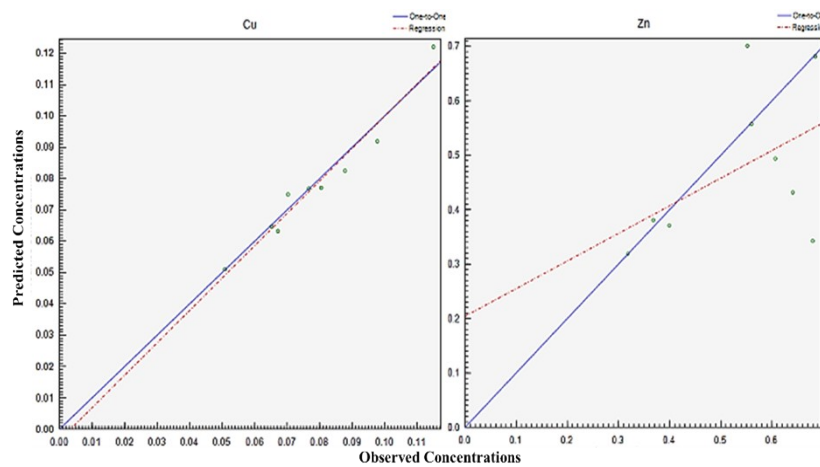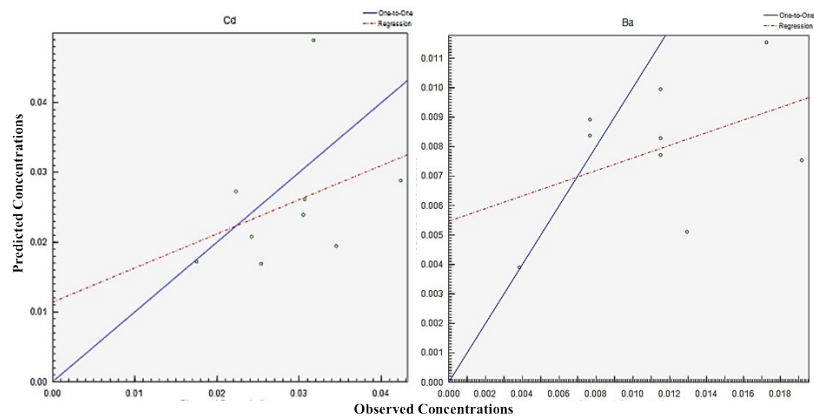

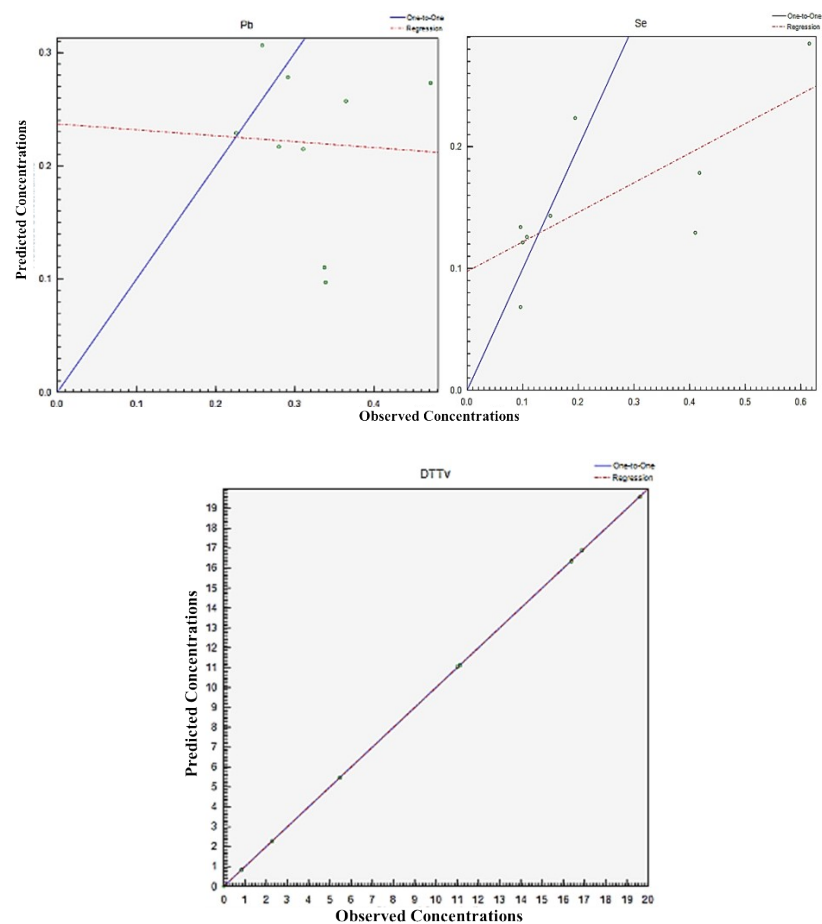

**Figure S1. Linear Regression between Modeled/Predicted and Observed Concentrations of PM<sub>2.5</sub>, Metals and DTTv**

## **Tables**

Table S2. t-test Analysis on Concentration of PM<sub>2.5</sub> and Meteorological Parameters during Haze and Non-Haze Period

Table S3. Mass Average Concentration of PM<sub>2.5</sub> and Mean Values of Meteorological Parameters during Haze and Non-Haze Period

Table S4. Cluster Means of 24-hour Air Mass Trajectories during November, December and January

Table S5. Concentration of Metals during Haze and Non-Haze Period

Table S6. Linear Correlation Coefficient of Metals to DTTv Activity

Table S7. The values used for all the parameters in Health Risk Assessment (HRA)

Table S8. Parameters used to evaluate Carcinogenic and Non-carcinogenic Risk via Inhalation, Dermal and Ingestion Pathway



**Table S2. t-test Analysis on Concentration of PM<sub>2.5</sub> and Meteorological Parameters during Haze and Non-Haze Period**

| <b>Parameters</b> | <b>t-value</b> | <b>Significance<br/>(2-tailed)</b> |
|-------------------|----------------|------------------------------------|
| <b>PM</b>         | 6.198          | 0.001                              |
| <b>Temp</b>       | 0.352          | 0.722                              |
| <b>RH</b>         | 7.077          | 0.001                              |
| <b>WS</b>         | -0.524         | 0.620                              |
| <b>WD</b>         | -0.074         | 0.943                              |
| <b>SR</b>         | -1.453         | 0.167                              |
| <b>Vis</b>        | -2.812         | 0.023                              |

**Significant at 95% confidence level ( $p < 0.05$ )**

**Table S3. Mass Average Concentration of PM<sub>2.5</sub> and Mean Values of Meteorological Parameters during Haze and Non-Haze Period**

| Parameters                              | Haze Period |      |          | Non-Haze Period |      |           |
|-----------------------------------------|-------------|------|----------|-----------------|------|-----------|
|                                         | Mean        | SD   | Range    | Mean            | SD   | Range     |
| PM <sub>2.5</sub> (µg m <sup>-3</sup> ) | 225.6       | 29.9 | 190 -260 | 125.9           | 44.2 | 74- 182   |
| Temperature (°C)                        | 11.9        | 2.2  | 6.1-15.3 | 16.0            | 2.9  | 12.3-21.6 |
| Relative Humidity (%)                   | 89          | 2    | 90-94    | 66              | 11   | 54-82     |
| Visibility (km)                         | 1.4         | 0.5  | 0.5-1.6  | 10.2            | 1.7  | 4.6-8.1   |
| Wind speed (m/s)                        | 1.1         | 0.4  | 0.6-1.6  | 1.3             | 0.9  | 0.4-2.3   |
| Wind Direction                          | N-NW        |      |          | N-NW            |      |           |

**Table S4. Cluster Means of 24-hour Air Mass Trajectories during November, December and January**

| <b>Months</b>   | <b>Cluster 1</b> | <b>Cluster 2</b> | <b>Cluster 3</b> | <b>Cluster 4</b> | <b>Cluster 5</b> | <b>Cluster 6</b> | <b>Cluster 7</b> |
|-----------------|------------------|------------------|------------------|------------------|------------------|------------------|------------------|
| <b>November</b> | <b>12%</b>       | <b>33%</b>       | <b>27%</b>       | <b>10%</b>       | <b>6%</b>        | <b>10%</b>       | <b>3%</b>        |
| <b>December</b> | <b>7%</b>        | <b>12%</b>       | <b>4%</b>        | <b>25%</b>       | <b>3%</b>        | <b>32%</b>       | <b>17%</b>       |
| <b>January</b>  | <b>28%</b>       | <b>17%</b>       | <b>13%</b>       | <b>1%</b>        | <b>24%</b>       | <b>8%</b>        | <b>9%</b>        |

**Table S4. Concentration of Metals during Haze and Non-Haze Period**

| <b>Metals</b> | <b>Haze Period (<math>\mu\text{g m}^{-3}</math>)</b> | <b>Non-Haze Period (<math>\mu\text{g m}^{-3}</math>)</b> |
|---------------|------------------------------------------------------|----------------------------------------------------------|
| <b>Ca</b>     | 4.5 $\pm$ 0.7                                        | 2.8 $\pm$ 0.7                                            |
| <b>Fe</b>     | 3.3 $\pm$ 1.7                                        | 1.0 $\pm$ 0.2                                            |
| <b>Na</b>     | 2.6 $\pm$ 0.5                                        | 1.8 $\pm$ 0.4                                            |
| <b>Mg</b>     | 1.9 $\pm$ 0.5                                        | 1.1 $\pm$ 0.2                                            |
| <b>K</b>      | 5.6 $\pm$ 1.2                                        | 4.1 $\pm$ 0.76                                           |
| <b>Al</b>     | 1.5 $\pm$ 0.7                                        | 0.8 $\pm$ 0.3                                            |
| <b>Ba</b>     | 0.01 $\pm$ 0.005                                     | 0.01 $\pm$ 0.005                                         |
| <b>Cd</b>     | 0.03 $\pm$ 0.004                                     | 0.01 $\pm$ 0.01                                          |
| <b>Cr</b>     | 0.05 $\pm$ 0.01                                      | 0.02 $\pm$ 0.007                                         |
| <b>Cu</b>     | 0.09 $\pm$ 0.01                                      | 0.06 $\pm$ 0.01                                          |
| <b>Mn</b>     | 0.1 $\pm$ 0.03                                       | 0.07 $\pm$ 0.01                                          |
| <b>Ni</b>     | 0.04 $\pm$ 0.01                                      | 0.02 $\pm$ 0.003                                         |
| <b>Pb</b>     | 0.3 $\pm$ 0.1                                        | 0.1 $\pm$ 0.04                                           |
| <b>Se</b>     | 0.3 $\pm$ 0.1                                        | 0.2 $\pm$ 0.1                                            |
| <b>Zn</b>     | 0.6 $\pm$ 0.1                                        | 0.5 $\pm$ 0.1                                            |

**Table S5. Linear Correlation Coefficient of Metals to DTT<sub>v</sub> Activity**

| <b>Metals</b> | <b>Correlation coefficient (r)</b> |                               |
|---------------|------------------------------------|-------------------------------|
|               | <b>Total Metal Fraction</b>        | <b>Water-Soluble Fraction</b> |
| <b>Na</b>     | <b>0.91</b>                        |                               |
| <b>Mg</b>     | <b>0.81</b>                        |                               |
| <b>Al</b>     | 0.17                               |                               |
| <b>K</b>      | <b>0.90</b>                        |                               |
| <b>Ca</b>     | 0.17                               |                               |
| <b>Cr</b>     | <b>0.81</b>                        | <b>0.81</b>                   |
| <b>Mn</b>     | <b>0.59</b>                        | <b>0.67</b>                   |
| <b>Fe</b>     | <b>0.65</b>                        | <b>0.66</b>                   |
| <b>Ni</b>     | <b>0.70</b>                        | 0.44                          |
| <b>Cu</b>     | <b>0.78</b>                        | <b>0.65</b>                   |
| <b>Zn</b>     | 0.41                               | <b>0.50</b>                   |
| <b>Cd</b>     | <b>0.72</b>                        | 0.46                          |
| <b>Ba</b>     | <b>0.74</b>                        |                               |
| <b>Pb</b>     | 0.24                               | 0.26                          |
| <b>Se</b>     | <b>0.57</b>                        |                               |

**Bold are the values having significant correlation with DTT<sub>v</sub>**

**Table S6. The values used for all the parameters in Health Risk Assessment (HRA)**

| <b>Factors</b>                  | <b>Notation</b>     | <b>Unit</b>         | <b>Values</b>                  |                                |
|---------------------------------|---------------------|---------------------|--------------------------------|--------------------------------|
|                                 |                     |                     | <b>Children</b>                | <b>Adults</b>                  |
| <b>Ingestion Rate</b>           | IR <sub>ing</sub>   | mg/day              | 200                            | 100                            |
| <b>Exposure Frequency</b>       | EF                  | days/years          | 365                            | 365                            |
| <b>Exposure Duration</b>        | ED                  | Year                | 6                              | 24                             |
| <b>Unit Conversion Factor</b>   | CF                  | kg/mg               | 1x10 <sup>-6</sup>             | 1x10 <sup>-6</sup>             |
| <b>Inhalation Rate</b>          | IR <sub>inh</sub>   | m <sup>3</sup> /day | 5                              | 20                             |
| <b>Body Weight</b>              | BW                  | Kg                  | 29                             | 70                             |
| <b>Average Lifetime</b>         | AT                  | Days                | EDx365<br>(non-carcinogens)    | EDx365<br>(non-carcinogens)    |
|                                 |                     |                     | 70x365<br>(carcinogens)        | 70x365<br>(carcinogens)        |
| <b>Exposure Time</b>            | ET                  | h/day               | 24                             | 24                             |
| <b>Average Lifetime (n)</b>     | AT <sub>n</sub>     | Hours               | EDx365x24<br>(non-carcinogens) | EDx365x24<br>(non-carcinogens) |
|                                 |                     |                     | 70x365x24<br>(carcinogens)     | 70x365x24<br>(carcinogens)     |
| <b>Skin Surface Area</b>        | SA                  | cm <sup>3</sup>     | 2800                           | 5700                           |
| <b>Skin Adherence Factor</b>    | AF                  | mg/cm <sup>2</sup>  | 0.2                            | 0.07                           |
| <b>Dermal Absorption Factor</b> | DAF                 |                     |                                |                                |
|                                 | DAF <sub>(Pb)</sub> |                     | 0.1                            | 0.1                            |

|                                   |       |       |
|-----------------------------------|-------|-------|
| DAF <sub>(Cd)</sub>               | 0.001 | 0.001 |
| DAF <sub>(Cu)</sub>               | 0.01  | 0.01  |
| DAF <sub>(Mn)</sub>               | 0.01  | 0.01  |
| DAF <sub>(Zn)</sub>               | 0.01  | 0.01  |
| DAF <sub>(Al)</sub>               | 0.01  | 0.01  |
| DAF <sub>(Other<br/>metals)</sub> | 0.01  | 0.01  |

**Table S8. Parameters used to evaluate Carcinogenic and Non-carcinogenic Risk via Inhalation, Dermal and Ingestion Pathway**

| Parameter                 | Pb       | Cd       | Cu       | Mn       | Zn       | Al       | Cr       | Ni       | References                                                                                 |
|---------------------------|----------|----------|----------|----------|----------|----------|----------|----------|--------------------------------------------------------------------------------------------|
| <b>T<sub>f</sub></b>      | 5        | 5        |          |          | 1        |          |          |          | (Zhang et al., 2021b)                                                                      |
| <b>RfD<sub>oral</sub></b> | 3.50E-03 | 5.00E-04 | 4.00E-03 | 1.40E-01 | 3.00E-01 | 1        | 3.00E-03 | 1.10E-02 | (Han et al., 2021; Mainka, 2021; Sakunkoo et al., 2022; US EPA, 1989; Zhang et al., 2021b) |
| <b>RfC<sub>inh</sub></b>  | 3.52E-03 | 1.00E-05 | 4.02E-03 | 5.00E-05 | 3.01E-01 | 5.00E-03 | 1.00E-04 | 2.00E-05 | (Han et al., 2021; Mainka, 2021; US EPA, 2009; Zhang et al., 2021b)                        |
| <b>GI<sub>ABS</sub></b>   | 1        | 1.00E-03 | 1        | 4.00E-02 | 1        |          | 2.50E-02 | 4.00E-02 | (Han et al., 2021; Mainka, 2021; Sakunkoo et al., 2022; US EPA, 2002; Zhang et al., 2021b) |
| <b>SF<sub>oral</sub></b>  | 8.50E-03 |          |          |          |          |          | 5.00E-01 | 9.10E-01 | (Mainka, 2021; US EPA, 2004; Zhang et al.,                                                 |



|                                |          |          |  |  |  |  |  |  |                                                            |
|--------------------------------|----------|----------|--|--|--|--|--|--|------------------------------------------------------------|
|                                |          |          |  |  |  |  |  |  | 2021b)                                                     |
| <b>Inhalation<br/>UR (IUR)</b> | 1.20E-05 | 1.80E-03 |  |  |  |  |  |  | (Sakunkoo et al., 2022; US EPA, 2009; Zhang et al., 2021b) |

## **Figures**

Figure S2. HYSPLIT-derived Air Mass Backward Trajectories and MODIS Aqua True Color Imagery overlaid with MODIS fire counts for (a) November (b) December (c) January 2019 (major wind direction at receptor site are shown by arrows)

Figure S3. Cluster plots for 24-hour trajectories for the month November 2019

Figure S4. Cluster plots for 24-hour trajectories for the month December 2019

Figure S5. Cluster plots for 24-hour trajectories for the month January 2019

Figure S6. The  $Q/Q_{\text{expected}}$  graphs for (a) Factor 3 (b) Factor 4 and (c) Factor 5

Figure S7. Residual Analysis for (a) Factor 3, (b) Factor 4 and (c) Factor 5

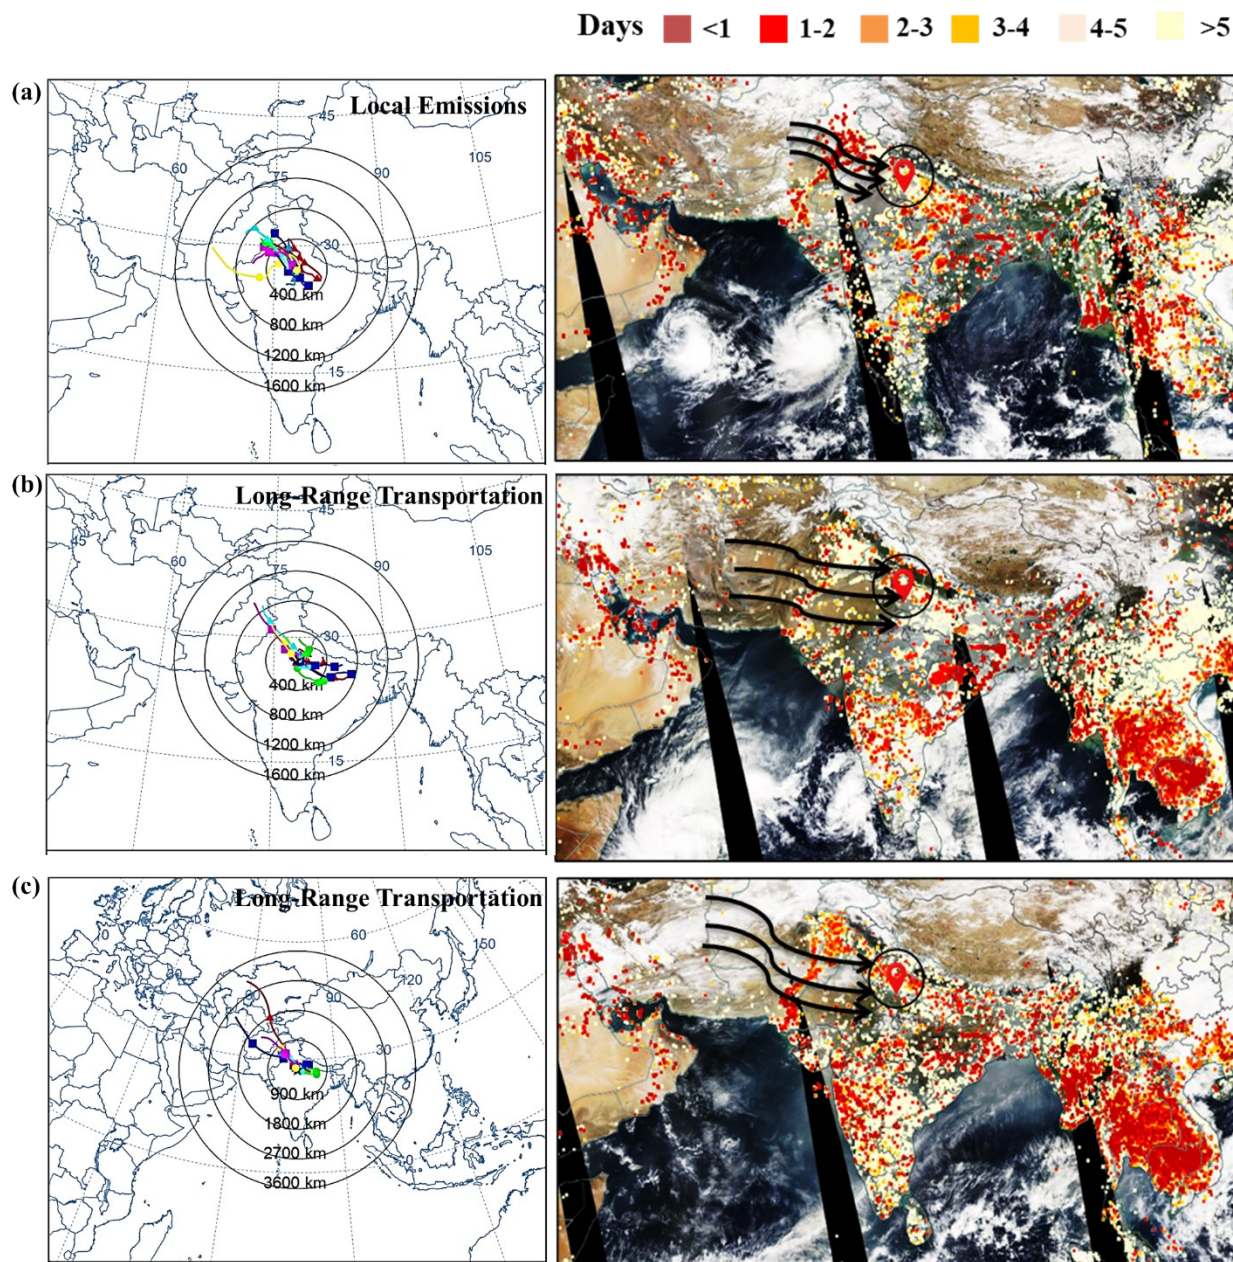

**Figure S2. HYSPLIT-derived Air Mass Backward Trajectories and MODIS Aqua True Color Imagery overlaid with MODIS fire counts for (a) November (b) December (c) January 2019 (major wind direction at receptor site are shown by arrows)**

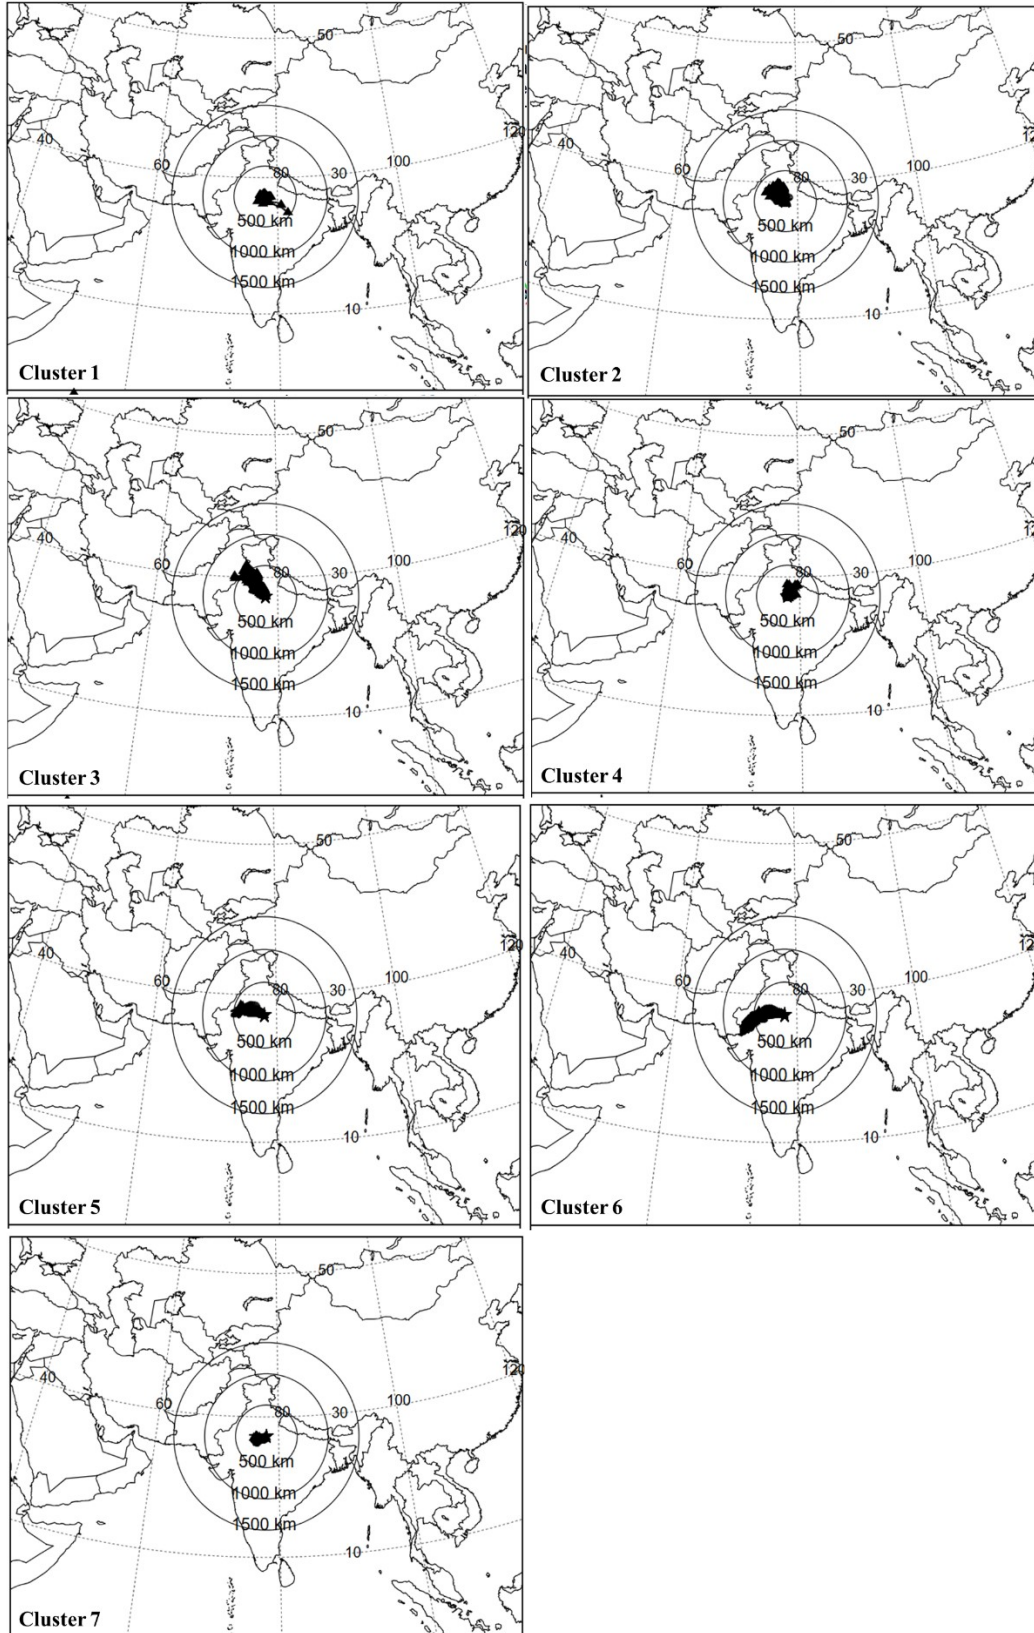

**Figure S3. Cluster plots for 24-hour trajectories for the month November 2019**



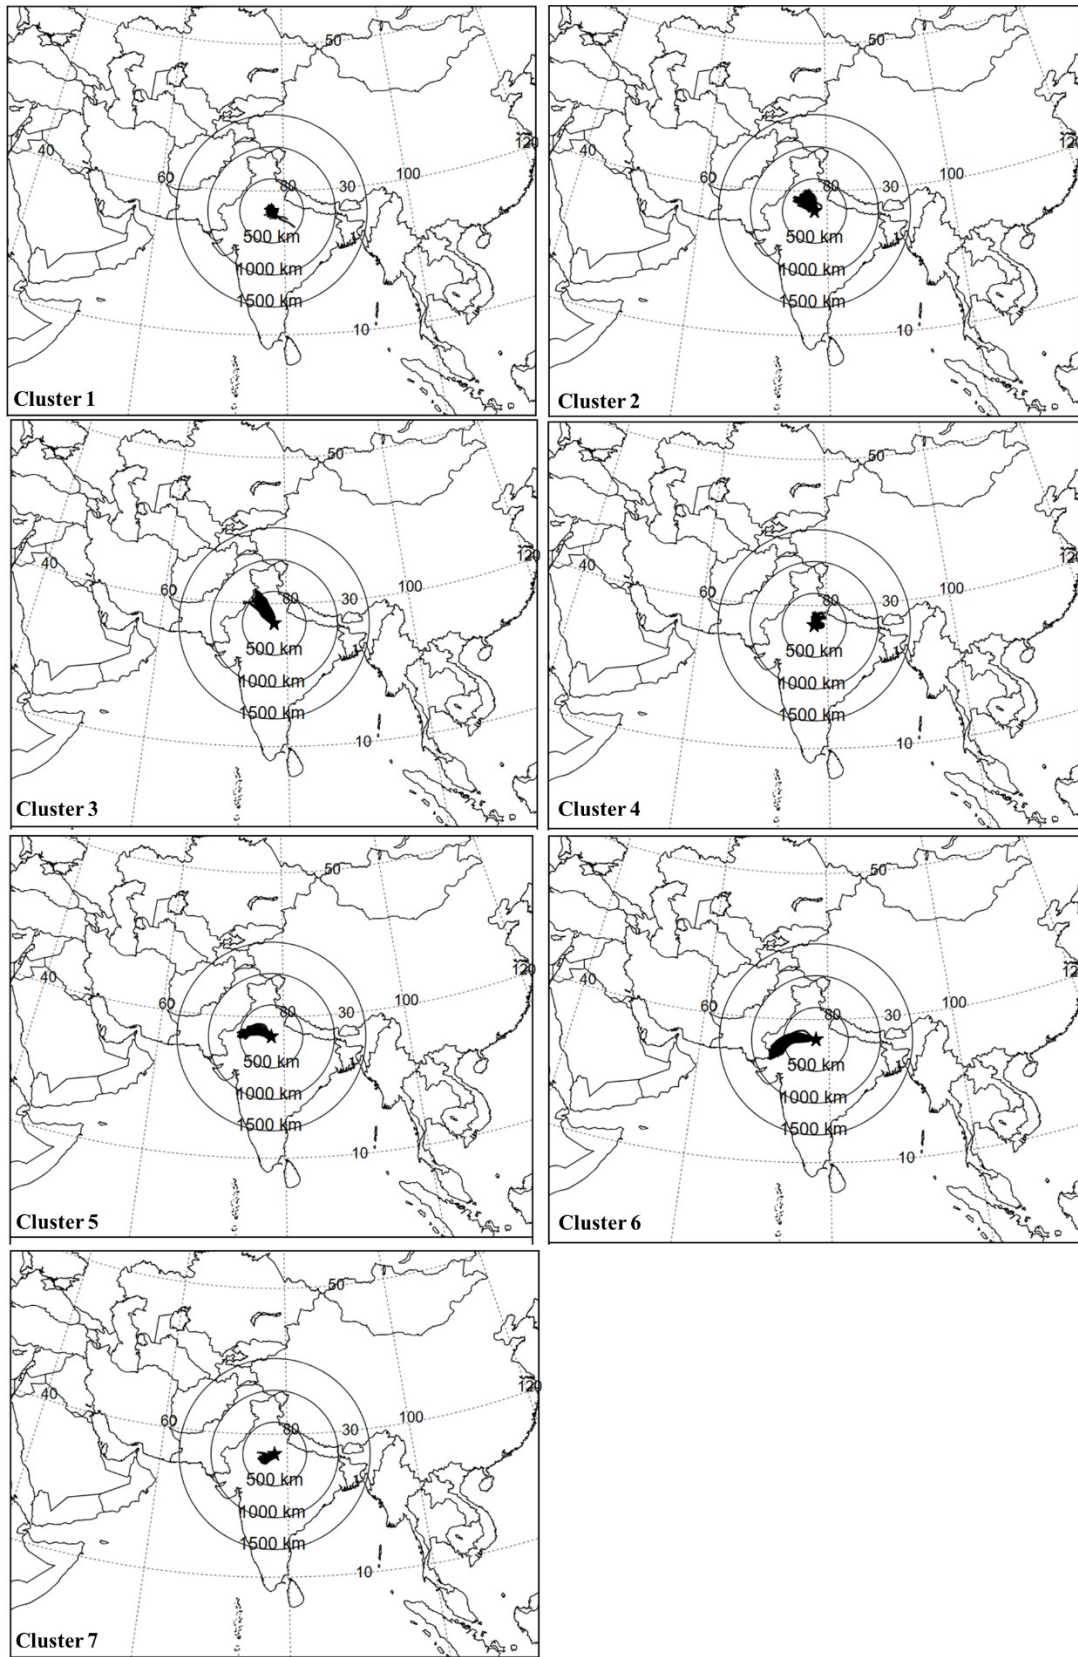

**Figure S4. Cluster plots for 24-hour trajectories for the month December 2019**

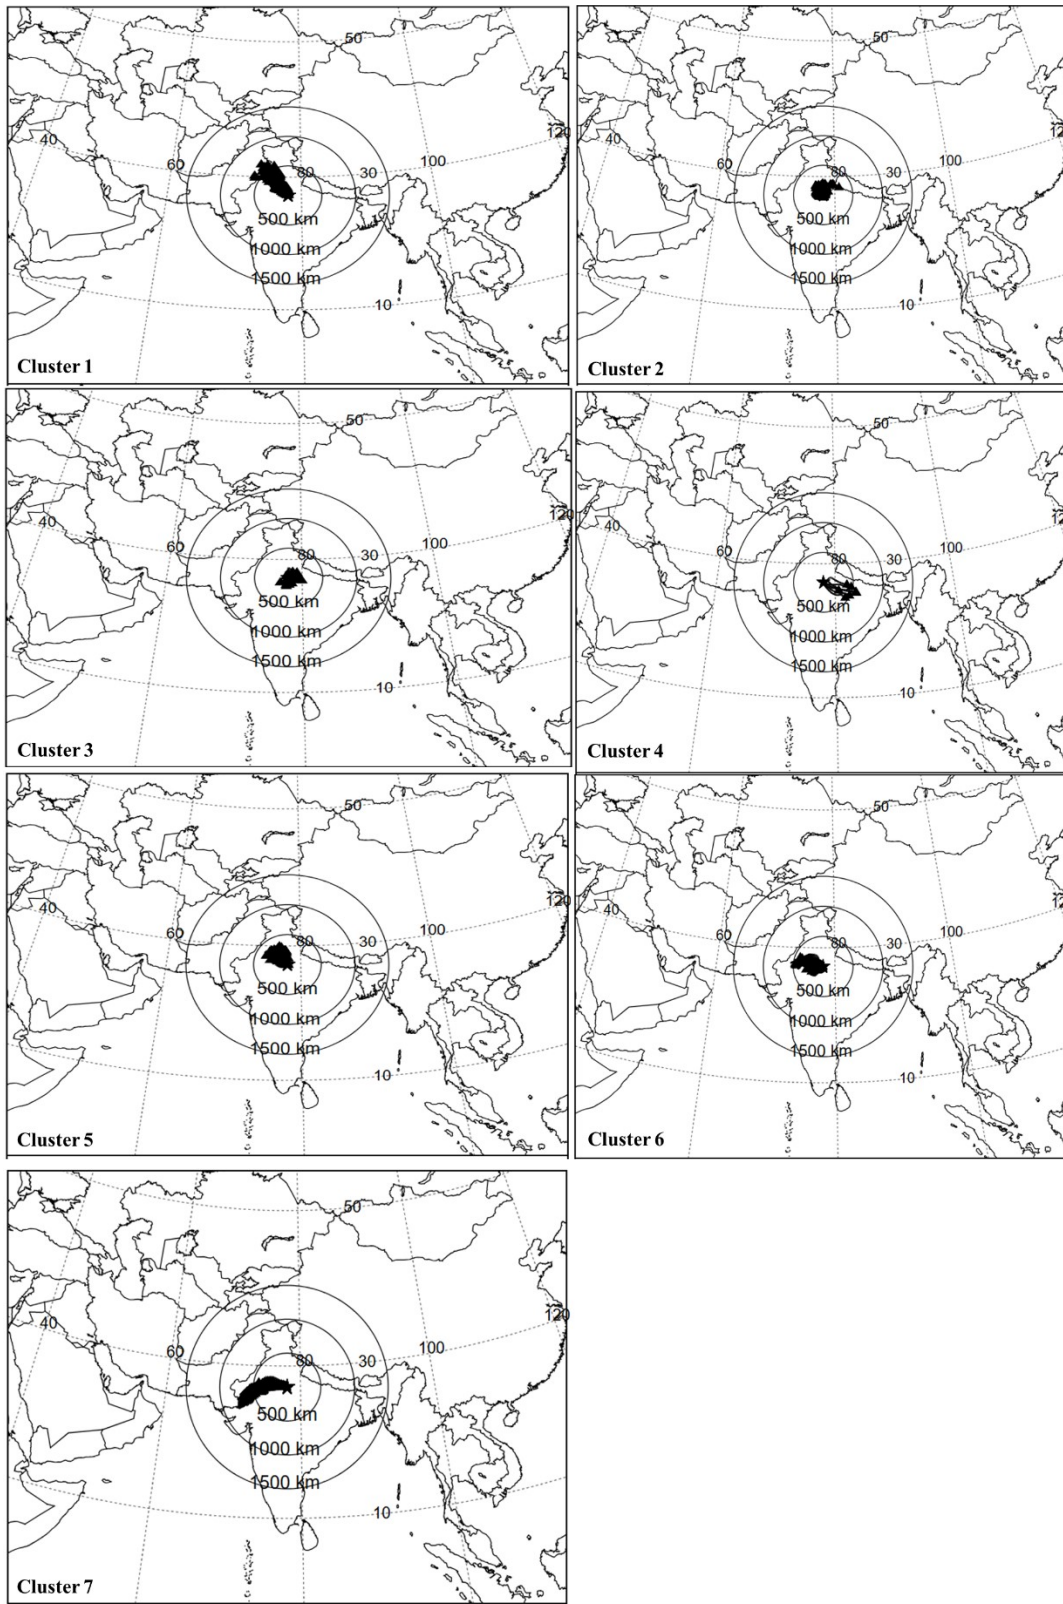

**Figure S5. Cluster plots for 24-hour trajectories for the month January 2019**

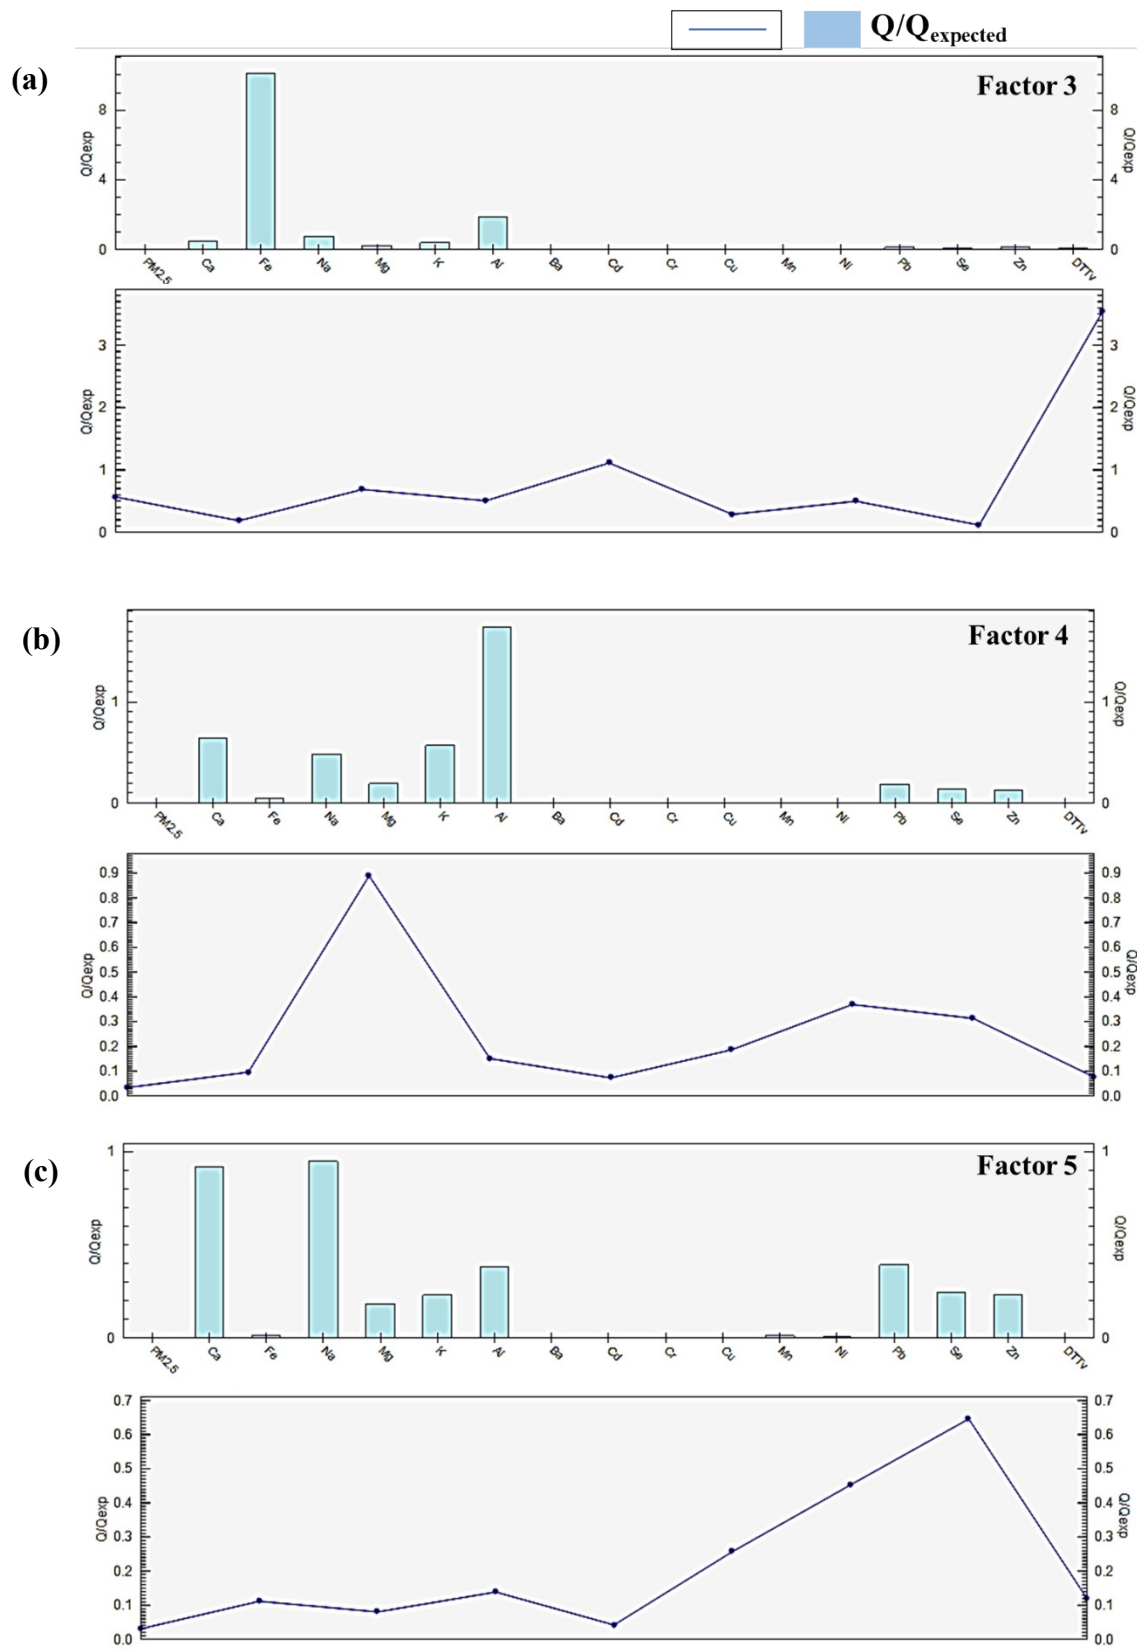

**Figure S6. The  $Q/Q_{\text{expected}}$  graphs for (a) Factor 3 (b) Factor 4 and (c) Factor 5**

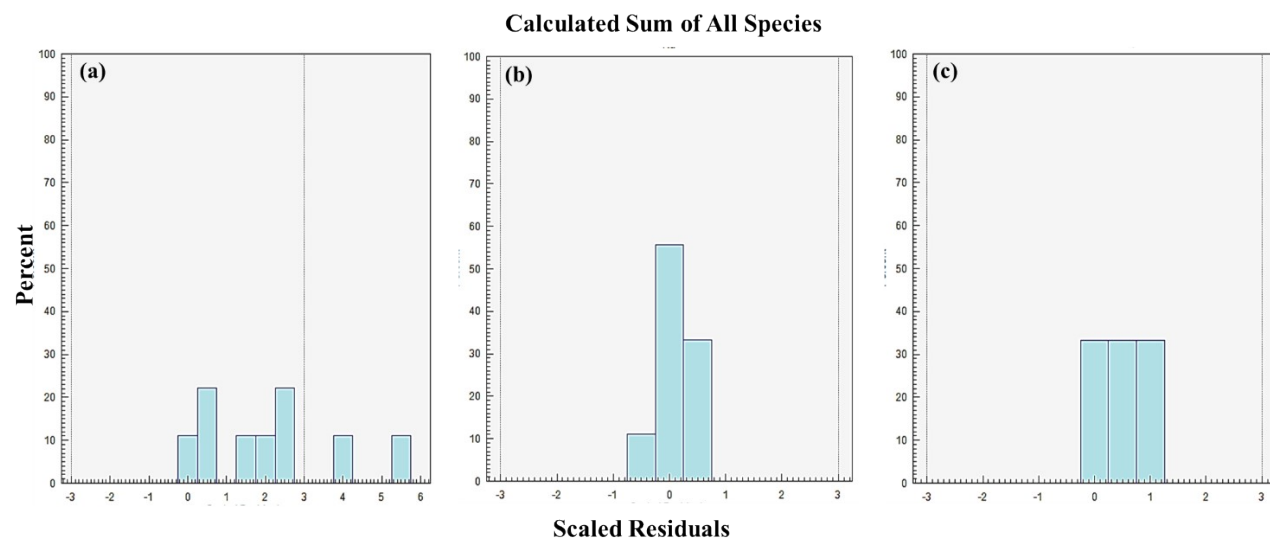

**Figure S7. Residual Analysis for (a) Factor 3, (b) Factor 4 and (c) Factor 5**



## References

- EPA PMF Guide, 2008. (2008). EPA Positive Matrix Factorization (PMF) 3.0 Fundamentals & User Guide. *Cir.Nii.Ac.Jp*, 81.
- Han, J., Lee, S., Mammadov, Z., Kim, M., Mammadov, G., & Ro, H. M. (2021). Source apportionment and human health risk assessment of trace metals and metalloids in surface soils of the Mugan Plain, the Republic of Azerbaijan. *Environmental Pollution*, 290. <https://doi.org/10.1016/j.envpol.2021.118058>
- Mainka, A. (2021). Children health risk assessment of metals in total suspended particulate matter (Tsp) and pm1 in kindergartens during winter and spring seasons. *Atmosphere*, 12(9), 1096. <https://doi.org/10.3390/atmos12091096>
- Murari, V., Singh, N., Ranjan, R., Singh, R. S., & Banerjee, T. (2020). Source apportionment and health risk assessment of airborne particulates over central Indo-Gangetic Plain. *Chemosphere*, 257. <https://doi.org/10.1016/j.chemosphere.2020.127145>
- Roy, D., Singh, G., & Seo, Y. C. (2019). Carcinogenic and non-carcinogenic risks from PM10-and PM2.5-Bound metals in a critically polluted coal mining area. *Atmospheric Pollution Research*, 10(6), 1964–1975. <https://doi.org/10.1016/j.apr.2019.09.002>
- Sakunkoo, P., Thonglua, T., Sangkham, S., Jirapornkul, C., Limmongkon, Y., Daduang, S., Tessiri, T., Rayubkul, J., Thongtip, S., Maneenin, N., & Pimonsree, S. (2022). Human health risk assessment of PM2.5-bound heavy metal of anthropogenic sources in the Khon Kaen Province of Northeast Thailand. *Heliyon*, 8(6), e09572. <https://doi.org/10.1016/j.heliyon.2022.e09572>
- Sharma, S. K., & Mandal, T. K. (2017). Chemical composition of fine mode particulate matter (PM2.5) in an urban area of Delhi, India and its source apportionment. *Urban Climate*, 21, 106–122. <https://doi.org/10.1016/j.uclim.2017.05.009>
- US EPA. (2004). *Risk Assessment Guidance for Superfund (RAGS): Part E | US EPA*. <https://www.epa.gov/risk/risk-assessment-guidance-superfund-rags-part-e>
- US EPA. (1989). *Risk Assessment: Guidance for Superfund Volume 1 Human Health Evaluation Manual (Part A)*. [http://www.epa.gov/swerrims/riskassessment/risk\\_superfund.html](http://www.epa.gov/swerrims/riskassessment/risk_superfund.html)
- US EPA. (2002). *Risk Assessment: Guidance for Superfund Volume I: Human Health Evaluation Manual (Part E, Supplemental Guidance for Dermal Risk Assessment) Final*. <http://www.epa.gov/oswer/riskassessment/>
- US EPA. (2009). *RISK ASSESSMENT GUIDANCE FOR SUPERFUND VOLUME I: HUMAN HEALTH EVALUATION MANUAL (RAGS) PART F, SUPPLEMENTAL GUIDANCE FOR INHALATION RISK ASSESSMENT*. <https://www.epa.gov/risk/risk-assessment-guidance-superfund-rags-part-f>

Zhang, X., Eto, Y., & Aikawa, M. (2021a). Risk assessment and management of PM2.5-bound heavy metals in the urban area of Kitakyushu, Japan. *Science of the Total Environment*, 795. <https://doi.org/10.1016/j.scitotenv.2021.148748>

Zhang, X., Eto, Y., & Aikawa, M. (2021b). Risk assessment and management of PM2.5-bound heavy metals in the urban area of Kitakyushu, Japan. *Science of the Total Environment*, 795. <https://doi.org/10.1016/j.scitotenv.2021.148748>
